# Supplementary material
Source: Springer Nature journal article supplement (https://www.springermedizin.de/resource/supplementary/12958_2014_1282_MOESM1_ESM.pdf/9566950)
Supplement: MOESM1 [file 9566950]

**Supplemental Table S1 – Microsatellite marker analysis of blastomeres from embryos 1, 3 and 4**

| Cell                   | 1       | 2       | 3       | 4       | 5       | 6       | 7       | 8       |
|------------------------|---------|---------|---------|---------|---------|---------|---------|---------|
| <b><u>Embryo 1</u></b> |         |         |         |         |         |         |         |         |
| <i>Chromosome 2</i>    |         |         |         |         |         |         |         |         |
| D2S360                 | -/304   | 289/304 | 289/304 | 289/304 | 289/304 | -/289   | 289/304 | 289/304 |
| D2S2300                | -/434   | 421/434 | 421/434 | 421/434 | 421/434 | 421/434 | -/434   | 421/434 |
| STR 2-02               | 327/335 | 327/335 | 327/-   | 327/-   | 327/335 | -/335   | 327/335 | 327/335 |
| <i>Chromosome 14</i>   |         |         |         |         |         |         |         |         |
| STR 14-02              | 193/197 | 193/197 | 193/197 | 193/197 | 193/197 | 193/197 | 193/197 | 193/-   |
| D14S1016               | 264/279 | 264/279 | 264/279 | 264/279 | 264/279 | 264/279 | 264/279 | 264/279 |
| <b><u>Embryo 3</u></b> |         |         |         |         |         |         |         |         |
| <i>Chromosome 14</i>   |         |         |         |         |         |         |         |         |
| D14S1016               | 272/279 | 272/279 | 272/279 | 272/279 | 279     | *       | -       | 272/279 |
| <i>Chromosome 15</i>   |         |         |         |         |         |         |         |         |
| D15S161                | 389/397 | 389/397 | 389/397 | 289/397 | 397     | *       | -       | 389/397 |
| D15S978                | 183/189 | 183/189 | 183/-   | 183/189 | 183     | *       | -       | 183/189 |
| <b><u>Embryo 4</u></b> |         |         |         |         |         |         |         |         |
| <i>Chromosome 14</i>   |         |         |         |         |         |         |         |         |
| STR 14-02              | 180     | 180/193 | -       | 180/193 | 180/193 | 180/193 | 180/193 | 180/193 |
| <i>Chromosome 15</i>   |         |         |         |         |         |         |         |         |
| D15S161                | 397     | 389/397 | -       | 389/397 | 389/397 | 389/397 | 389/397 | 389/397 |
| D15S978                | -       | 183/189 | -       | -/189   | 183/189 | 183/189 | 183/189 | 183/189 |
| <i>Chromosome 16</i>   |         |         |         |         |         |         |         |         |
| D16S409                | -       | 212     | -       | 212     | 212     | -       | 212     | 212     |
| D16S3099               | 265     | 265     | -       | 265     | 265     | 265     | 265     | 265     |

Blastomeres with aneuploid chromosome are shown in the shaded blocks. Only informative markers with distinctively separated alleles were included. Only abnormal embryos are shown.

\*sample lost after aCGH, no microsatellite marker analysis was performed
